# Supplementary material
Source: PubMed Central journal article supplement (PMC7100362)
Supplement: 41375_2015_BFleu2015125_MOESM15_ESM.pdf [file 41375_2015_BFleu2015125_MOESM15_ESM.pdf]

## Supplementary Tables

**Supplementary Table S1.** Amino acid sequence of Clone45.

| CDRs        | 1                                                                                                                                                                                                                                                                | 2                 | 3         |
|-------------|------------------------------------------------------------------------------------------------------------------------------------------------------------------------------------------------------------------------------------------------------------------|-------------------|-----------|
| <b>VH</b>   | SYAMS                                                                                                                                                                                                                                                            | QIDPWGQETLYADSVKG | LTGRFDY   |
| <b>VL</b>   | RASQSISSYLN                                                                                                                                                                                                                                                      | SASQLQS           | QQGPGTPNT |
| <b>scFv</b> | EVQLLESGGGLVQPGGSLRLSCAASGFTFSSYAMSWVRQAPGKGLEWVSQIDPW<br>GQETLYADSVKGRFTISRDNKNTLYLQMNSLRAEDTAVYYCAKLTGRFDYWGQ<br>GTLVTVSSGGGGSGGGGSGGGGSTDIQMTQSPSSLASVGDRTITCRASQSISSYL<br>NWFYQQKPGKAPKLLIYSASQLQSGVPSRFSGSGSGTDFTLTISSLQPEDFATYYCQ<br>QQGPGTPNTFGQGTKVEIKRA |                   |           |

**Supplementary Table S2.** Listing of 4 most frequent sequences selected from the yeast display library.

| Amino acid position | Heavy chain |          |          | Light chain |          |          |          |          | Frequency of clones |      |
|---------------------|-------------|----------|----------|-------------|----------|----------|----------|----------|---------------------|------|
|                     | 28          | 50       | 87       | 1           | 30       | 53       | 65       | 70       |                     | 77   |
| Clone45             | T           | Q        | R        | D           | S        | Q        | S        | D        | S                   |      |
| S3.1                | T           | <u>L</u> | <u>G</u> | D           | S        | Q        | S        | D        | <u>N</u>            | n=11 |
| S3.3                | T           | <u>L</u> | R        | <u>N</u>    | S        | <u>L</u> | <u>N</u> | D        | S                   | n=14 |
| S3.6                | T           | <u>L</u> | R        | D           | <u>N</u> | Q        | S        | <u>V</u> | S                   | n=1  |
| S3.22               | <u>L</u>    | <u>L</u> | R        | D           | S        | Q        | S        | D        | S                   | n=3  |

The mutated residues are underlined. Amino acid positions are given as Kabat numbers (<http://www.imgt.org>).

**Supplementary Table S3.** Expression of HLA-A2 and immunostaining of Q2L scFv-Fc on cells.

| Cell line           | Tumor type                          | Ratio (BB7.2/isotype)* | Ratio (Q2L/isotype)* | Q2L binding**   |
|---------------------|-------------------------------------|------------------------|----------------------|-----------------|
| K562                | Leukemia                            | 1.1                    | 1.1                  | Negative        |
| K562-HLA-A2         | Leukemia                            | 28.8                   | 2.5                  | Weakly Positive |
| Molt-4              | Leukemia                            | 1.1                    | 1.0                  | Negative        |
| THP-1               | Leukemia                            | 53.9                   | 35.6                 | Positive        |
| BA25-17             | Leukemia                            | 118.5                  | 7.2                  | Positive        |
| BA25-69             | Leukemia                            | 113.6                  | 19.1                 | Positive        |
| BV-173              | Leukemia                            | 209.2                  | 20.0                 | Positive        |
| SKN-JC-1            | NB                                  | 86.8                   | 5.1                  | Positive        |
| SKN-JC-2            | NB                                  | 53.3                   | 3.5                  | Weakly Positive |
| SKNJB               | NB                                  | 6.4                    | 3.2                  | Weakly Positive |
| LAN-1               | NB                                  | 4.5                    | 6.2                  | Positive        |
| SKNLD               | NB                                  | 0.9                    | 1.0                  | Negative        |
| SKMEL-5             | Melanoma                            | 32.1                   | 9.0                  | Positive        |
| JMN                 | Mesothelioma                        | 165.3                  | 10.2                 | Positive        |
| U87                 | Glioblastoma                        | 77.5                   | 10.8                 | Positive        |
| U251                | glioblastoma                        | 16.2                   | 3.2                  | Weakly Positive |
| U2 OS               | osteosarcoma                        | 21.7                   | 2.1                  | Weakly Positive |
| MDA-MB-231(HTB-26)  | Breast                              | 110.9                  | 6.5                  | Positive        |
| MDA-MB-361(HTB-27)  | Breast                              | 0.9                    | 1.4                  | Negative        |
| MDA-MB-468(HTB-132) | Breast                              | 1.1                    | 1.1                  | Negative        |
| SKBR3               | Breast                              | 1.1                    | 1.1                  | Negative        |
| MCF-7               | Breast                              | 9.9                    | 2.1                  | Weakly Positive |
| SKOV-3              | Ovarian                             | 1.0                    | 1.2                  | Negative        |
| OVCAR-3             | Ovarian                             | 7.8                    | 1.2                  | Negative        |
| OVCAR3-pp65         | Ovarian                             | 10.0                   | 1.4                  | Negative        |
| Colo 205            | Colon                               | 32.6                   | 2.2                  | Weakly Positive |
| Caco-2 (HTB-37)     | Colon                               | 26.8                   | 2.9                  | Weakly Positive |
| HTB37-pp65/GFP      | Colon                               | 10.9                   | 2.3                  | Weakly Positive |
| SW480               | Colon                               | 40.5                   | 3.2                  | Weakly Positive |
| SKHEP-1             | Liver                               | 28.3                   | 7.5                  | Positive        |
| HepG2               | liver                               | 14.4                   | 3.4                  | Weakly Positive |
| NCI-H345            | Small cell lung cancer              | 6.2                    | 1.7                  | Negative        |
| NCI-H522            | Non-small cell lung cancer          | 15.8                   | 1.5                  | Negative        |
| SK-ES-1             | Ewing's sarcoma                     | 7.7                    | 1.4                  | Negative        |
| JN-DSRCT            | Desmoplastic small round cell tumor | 5.1                    | 1.3                  | Negative        |
| T2                  |                                     | 178                    | 1.7                  | Negative        |

\*ratio of mean of fluorescence intensity. \*\*define the ratio below 2 as negative, 2-4 as weakly positive, >4 as positive. BB7.2 is a monoclonal anti-HLA-A2 antibody.

**Supplementary Table S4.** Immunostaining of Clone 45 and Q2L on normal HLA-A2[+] and HLA-A2[-] PBMC

| Cells                    | Ratio (BB7.2/isotype)* | Ratio (Clone45/isotype)* | Ratio (Q2L/isotype)* | Q2L binding**   |
|--------------------------|------------------------|--------------------------|----------------------|-----------------|
| HLA-A2[+]<br>PBMC (n=10) | 21.4                   | 1.1                      | 3.9                  | Weakly Positive |
| HLA-A2[-]<br>PBMC (n=4)  | 0.8                    | 1.1                      | 1.2                  | Negative        |

\*ratio of mean of fluorescence intensity. \*\*define the ratio below 2 as negative, 2-4 as weakly positive, >4 as positive. BB7.2 is a monoclonal anti-HLA-A2 antibody.

## Supplementary figure legends

**Supplementary Figure S1.** WT1 Clone 45 scFv is highly specific for the recombinant HLA-A2-RMFPNAPYL complex. **(a)** Purified WT1 Clone 45 scFv was tested for binding to recombinant, biotinylated-HLA-A2-peptide complexes by ELISA. Purified WT1 Clone 45 scFv maintained its specificity over a panel of HLA-A2-peptide complex in addition to its inability to bind to the native peptide outside of the context of MHC. The anti-HLA-A2 antibody BB7.2 was included to demonstrate that all HLA-A2-peptide complexes are adherent and presented properly on the plate. **(b)** Evidence that TAP-deficient T2 cells can be loaded with exogenous peptides. T2 cells were pulsed with (solid, unfilled lines) or without (dashed, unfilled lines) RMFPNAPYL (left panel) or LLDFVRFMGV peptides (right panel) at 40  $\mu$ M in serum-free IMDM media at 37°C for 5 hours. The cells were then stained with a mouse-anti-human HLA-A2-FITC conjugated antibody (unfilled lines) or a control mouse IgG1-FITC conjugated antibody (filled lines) and analyzed on the FACS machine. The increase in fluorescence from the dashed line to the unfilled solid line signifies stabilization of the HLA-A2 molecule due to peptide binding and presentation. **(c)** Peptide pulsed T2 cells from A were stained with WT1 Clone 45 (unfilled lines) or a control scFv (filled lines), followed by detection using a biotinylated mouse-anti-myc-tag antibody and streptavidin-PE. Only T2 cells which had been pulsed with the RMFPNAPYL peptide (left panel), but not ones which had been pulsed with LLDFVRFMGV (right panel), could be stained by the WT1 Clone 45.

**Supplementary Figure S2.** Sensorgrams of binding kinetics of scFvs when measured by Biacore. Binding of scFv S3.1, S3.3, S3.6, Clone45 and Q2L were shown. Details of the experiments are described in the Materials and Methods.

**Supplementary Figure S3.** Epitope mapping **(a)** Model of the docked complex of Q2L with the crystal structure of HLA-A2-WT1-RMF (pdb 3HPJ). The binding epitope was predicted to involve the heavy chain CDR2 of Q2L with Tyr 8 of WT1<sub>126</sub>. **(b)** Binding of Q2L to T2 cells pulsed with WT1<sub>126</sub>-wildtype (RMF), Arg1Ala (A1), Phe3Ala (A3), Pro4Ala (A4), Asn5Ala (A5), Pro7Ala (A7) or Tyr8Ala (A8), measured by flow cytometry. Positions 2 and 9 were not mutated since they are anchor residues, and Position 6 is Ala in WT peptide. A 40% reduction in binding was observed when Tyr8 was mutated to Ala. All peptides were verified to bind to HLA-A2 by staining with anti-HLA-A2 clone BB7.2.

**Supplementary Figure S4.** **(a)** PG13 cells transfected with Q2L-CAR constructs were stained with WT1<sub>126</sub> tetramer. **(b)** K562 cells were transfected with Q2L-CAR and stained with WT1<sub>126</sub> tetramer.
